# Supplementary material
Source: Springer Nature journal article supplement (https://www.springermedizin.de/resource/supplementary/13002_2013_366_MOESM3_ESM.pdf/9627726)

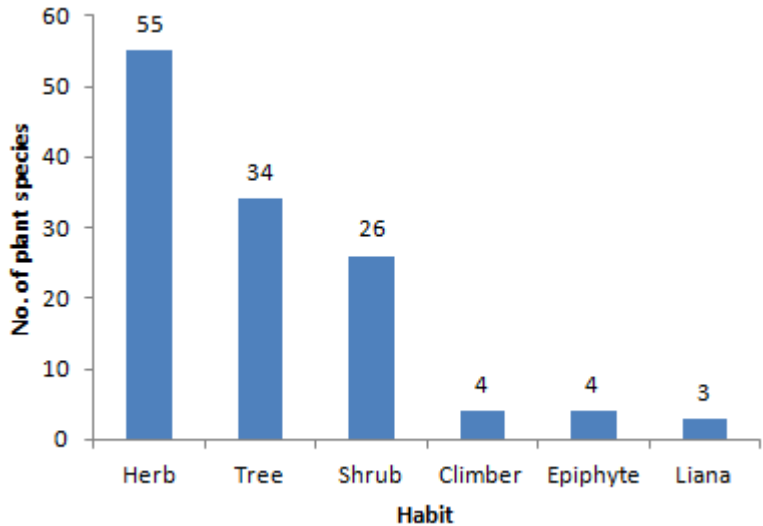

Supplement: MOESM3 [file 9627726]
